# Supplementary material for: Maskless, rapid manufacturing of glass microfluidic devices using a picosecond pulsed laser
Source: PubMed Central journal article supplement (PMC6934552; doi:10.1038/s41598-019-56711-5), 2019-12-27
Supplement: 41598_2019_56711_MOESM1_ESM.pdf [file 41598_2019_56711_MOESM1_ESM.pdf]

# Maskless, rapid manufacturing of glass microfluidic devices using a picosecond pulsed laser

Krystian L. Wlodarczyk<sup>1,2,\*</sup>, Duncan P. Hand<sup>2</sup>, and M. Mercedes Maroto-Valer<sup>1</sup>

<sup>1</sup> Research Centre for Carbon Solutions (RCCS), Institute of Mechanical, Process and Energy Engineering, School of Engineering and Physical Sciences, Heriot-Watt University, Edinburgh, UNITED KINGDOM

<sup>2</sup> Institute of Photonics and Quantum Sciences, School of Engineering and Physical Sciences, Heriot-Watt University, Edinburgh, UNITED KINGDOM

\* Krystian L. Wlodarczyk; [K.L.Wlodarczyk@hw.ac.uk](mailto:K.L.Wlodarczyk@hw.ac.uk); tel. +44 (0) 131 451 3105

## Contents of Supplementary Materials

**Table S1.** Laser micromachining of Borofloat 33 glass by using  $\lambda = 515$  nm. Results are given for a single laser pass and two laser passes. The datasets for a single laser pass were used to plot the graphs in Figure 3. .... 3

**Table S2.** Laser microwelding of 1.1 mm thick Borofloat 33 glass plates by using sample translation velocities ( $v$ ) of 2, 4 and 6 mm/s. Datasets for  $v = 2$  mm/s were used to plot the graphs shown in Figure 5. An area of the heat-affected zone (HAZ) was calculated by assuming that the cross-section of HAZ has an elliptical shape..... 4

**Figure S1.** Cross-section and top view of the weld seams generated at the glass-glass interface by using laser powers ( $P$ ) of 1.00 and 1.25W and a sample translation velocity ( $v$ ) of 2 mm/s. The laser beam was focused at a distance  $Z$  (as indicated on images) below the top surface of the upper (1.1 mm thick) glass. .... 6

**Figure S2.** Cross-section and top view of the weld seams generated at the glass-glass interface by using laser powers ( $P$ ) of 1.50 and 1.75W and a sample translation velocity ( $v$ ) of 2 mm/s. The laser beam was focused at a distance  $Z$  (as indicated on images) below the top surface of the upper (1.1 mm thick) glass. .... 7

**Figure S3.** Cross-section and top view of the weld seams generated at the glass-glass interface by using laser powers ( $P$ ) of 2.00 and 2.25W and a sample translation velocity ( $v$ ) of 2 mm/s. The laser beam was focused at a distance  $Z$  (as indicated on images) below the top surface of the upper (1.1 mm thick) glass. .... 8

**Figure S4.** Cross-section and top view of the weld seams generated at the glass-glass interface by using laser powers ( $P$ ) of 2.50 and 2.75W and a sample translation velocity ( $v$ ) of 2 mm/s. The laser beam was focused at a distance  $Z$  (as indicated on images) below the top surface of the upper (1.1 mm thick) glass. .... 9

**Figure S5.** Cross-section and top view of the weld seams generated at the glass-glass interface by using laser powers ( $P$ ) of 2.50 and 2.75W and a sample translation velocity ( $v$ ) of 4 mm/s. The laser beam was focused at a distance  $Z$  (as indicated on images) below the top surface of the upper (1.1 mm thick) glass. .... 10

**Figure S6.** Cross-section and top view of the weld seams generated at the glass-glass interface by using laser powers ( $P$ ) of 3.00 and 3.25W and a sample translation velocity ( $v$ ) of 4 mm/s. The laser beam was focused at a distance  $Z$  (as indicated on images) below the top surface of the upper (1.1 mm thick) glass. .... 11

**Figure S7.** Cross-section and top view of the weld seams generated at the glass-glass interface by using laser powers ( $P$ ) of 2.50 and 2.75W and a sample translation velocity ( $v$ ) of 6 mm/s. The laser beam was focused at a distance  $Z$  (as indicated on images) below the top surface of the upper (1.1 mm thick) glass. .... 12

**Figure S8.** Cross-section and top view of the weld seams generated at the glass-glass interface by using laser powers ( $P$ ) of 3.00 and 3.25W and a sample translation velocity ( $v$ ) of 6 mm/s. The laser beam was focused at a distance  $Z$  (as indicated on images) below the top surface of the upper (1.1 mm thick) glass. .... 13

**Figure S9.** Cross-section of the weld seams generated at the interface of two glass plates. The laser power ( $P$ ) used for welding was 2.5 W, whereas the sample translation velocity ( $v$ ) was 2 mm/s. The laser beam was focused approximately 0.1 mm below the glass-glass interface. The distance between the welds is 0.5 mm. The images were taken using a Leica optical microscope with an objective zoom: (a) x5 and (b) x10. Please note that these images also show a welding line which was generated along the glass-glass interface using the same process parameters. For these laser welding parameters, the periodicity of the welds is observed..... 14

**Table S3.** Laser machining of Borofloat 33 glass by using a defocused laser beam (see the  $2\omega$  values) at  $\lambda = 515$  nm. These datasets were used to plot the graphs in Figure 7. .... 15

**Figure S10.** Glass surfaces after laser micromachining using: (a) a single laser pass, laser spot diameter ( $2\omega$ ) of  $24 \mu\text{m}$ , and peak fluence ( $F$ ) of  $25 \text{ J/cm}^2$ ; (b) two laser passes orthogonal to each other using the same laser spot sizes and peak fluence values ( $2\omega = 24 \mu\text{m}$  and  $F = 25 \text{ J/cm}^2$ ); (c)-(l) two laser passes orthogonal to each other using two different laser spot sizes and peak fluence values (first pass:  $2\omega = 24 \mu\text{m}$  and  $F = 25 \text{ J/cm}^2$ , second pass: the  $2\omega$  and  $F$  values as listed in each image). The other laser process parameters were as follows: PRF = 40 kHz,  $v = 80 \text{ mm/s}$ ,  $\Delta H = 6 \mu\text{m}$  (bidirectional sequential scanning). The first laser pass was always along the X axis, whereas the second pass was along the Y axis. The axes are indicated in Figure S9 (a)..... 16

**Table S1.** Laser micromachining of Borofloat 33 glass by using  $\lambda = 515$  nm. Results are given for a single laser pass and two laser passes. The datasets for a single laser pass were used to plot the graphs in Figure 3.

| Single laser pass   |                         |                           |              |             |                          |                           |                                    |                                         |                     |                             |                     |
|---------------------|-------------------------|---------------------------|--------------|-------------|--------------------------|---------------------------|------------------------------------|-----------------------------------------|---------------------|-----------------------------|---------------------|
| $E_p$<br>[ $\mu$ J] | $2\omega$<br>[ $\mu$ m] | F<br>[J/cm <sup>2</sup> ] | PRF<br>[kHz] | v<br>[mm/s] | $\Delta H$<br>[ $\mu$ m] | N<br>[1/mm <sup>2</sup> ] | $E_{DOSE}$<br>[J/mm <sup>2</sup> ] | Process<br>time<br>[s/mm <sup>2</sup> ] | Depth<br>[ $\mu$ m] | MRR<br>[mm <sup>3</sup> /s] | $S_a$<br>[ $\mu$ m] |
| 24.6                | 24                      | 10.9                      | 20           | 40          | 2                        | 250000                    | 12.3                               | 25.00                                   | 58.4                | 0.0023                      | 1.37                |
| 33.6                | 24                      | 14.8                      | 20           | 40          | 2                        | 250000                    | 16.8                               | 25.00                                   | 68.4                | 0.0027                      | 1.65                |
| 42.8                | 24                      | 18.9                      | 20           | 40          | 2                        | 250000                    | 21.4                               | 25.00                                   | 81.0                | 0.0032                      | 1.79                |
| 52.2                | 24                      | 23.1                      | 20           | 40          | 2                        | 250000                    | 26.1                               | 25.00                                   | 93.4                | 0.0037                      | 1.91                |
| 61.7                | 24                      | 27.3                      | 20           | 40          | 2                        | 250000                    | 30.9                               | 25.00                                   | 105.9               | 0.0042                      | 2.06                |
| 71.1                | 24                      | 31.4                      | 20           | 40          | 2                        | 250000                    | 35.6                               | 25.00                                   | 115.9               | 0.0046                      | 2.20                |
| 24.6                | 24                      | 10.9                      | 20           | 40          | 4                        | 125000                    | 6.1                                | 12.50                                   | 38.2                | 0.0031                      | 1.10                |
| 33.6                | 24                      | 14.8                      | 20           | 40          | 4                        | 125000                    | 8.4                                | 12.50                                   | 45.7                | 0.0037                      | 1.23                |
| 42.8                | 24                      | 18.9                      | 20           | 40          | 4                        | 125000                    | 10.7                               | 12.50                                   | 51.7                | 0.0041                      | 1.37                |
| 52.2                | 24                      | 23.1                      | 20           | 40          | 4                        | 125000                    | 13.1                               | 12.50                                   | 56.7                | 0.0045                      | 1.52                |
| 61.7                | 24                      | 27.3                      | 20           | 40          | 4                        | 125000                    | 15.4                               | 12.50                                   | 60.7                | 0.0049                      | 1.51                |
| 71.1                | 24                      | 31.4                      | 20           | 40          | 4                        | 125000                    | 17.8                               | 12.50                                   | 67.4                | 0.0054                      | 1.60                |
| 24.6                | 24                      | 10.9                      | 20           | 40          | 6                        | 83500                     | 4.1                                | 8.33                                    | 30.1                | 0.0036                      | 1.03                |
| 33.6                | 24                      | 14.8                      | 20           | 40          | 6                        | 83500                     | 5.6                                | 8.33                                    | 36.3                | 0.0044                      | 1.04                |
| 42.8                | 24                      | 18.9                      | 20           | 40          | 6                        | 83500                     | 7.1                                | 8.33                                    | 39.6                | 0.0048                      | 1.05                |
| 52.2                | 24                      | 23.1                      | 20           | 40          | 6                        | 83500                     | 8.7                                | 8.33                                    | 44.8                | 0.0054                      | 1.07                |
| 61.7                | 24                      | 27.3                      | 20           | 40          | 6                        | 83500                     | 10.3                               | 8.33                                    | 46.1                | 0.0055                      | 1.00                |
| 71.1                | 24                      | 31.4                      | 20           | 40          | 6                        | 83500                     | 11.9                               | 8.33                                    | 49.4                | 0.0059                      | 1.01                |
| Two laser passes    |                         |                           |              |             |                          |                           |                                    |                                         |                     |                             |                     |
| $E_p$<br>[ $\mu$ J] | $2\omega$<br>[ $\mu$ m] | F<br>[J/cm <sup>2</sup> ] | PRF<br>[kHz] | v<br>[mm/s] | $\Delta H$<br>[ $\mu$ m] | N<br>[1/mm <sup>2</sup> ] | $E_{DOSE}$<br>[J/mm <sup>2</sup> ] | Process<br>time<br>[s/mm <sup>2</sup> ] | Depth<br>[ $\mu$ m] | MRR<br>[mm <sup>3</sup> /s] | $S_a$<br>[ $\mu$ m] |
| 24.6                | 24                      | 10.9                      | 20           | 40          | 2                        | 250000                    | 6.1                                | 12.5                                    | 27.1                | 0.0022                      | 1.51                |
| 33.6                | 24                      | 14.8                      | 20           | 40          | 2                        | 250000                    | 8.4                                | 12.5                                    | 35.4                | 0.0028                      | 1.72                |
| 42.8                | 24                      | 18.9                      | 20           | 40          | 2                        | 250000                    | 10.7                               | 12.5                                    | 40.1                | 0.0032                      | 1.50                |
| 52.2                | 24                      | 23.1                      | 20           | 40          | 2                        | 250000                    | 13.1                               | 12.5                                    | 47.3                | 0.0038                      | 1.56                |
| 61.7                | 24                      | 27.3                      | 20           | 40          | 2                        | 250000                    | 15.4                               | 12.5                                    | 51.6                | 0.0041                      | 1.66                |
| 71.1                | 24                      | 31.4                      | 20           | 40          | 2                        | 250000                    | 17.8                               | 12.5                                    | 57.3                | 0.0046                      | 1.47                |
| 24.6                | 24                      | 10.9                      | 20           | 40          | 4                        | 125000                    | 3.1                                | 6.25                                    | 19.4                | 0.0031                      | 1.04                |
| 33.6                | 24                      | 14.8                      | 20           | 40          | 4                        | 125000                    | 4.2                                | 6.25                                    | 21.9                | 0.0035                      | 1.15                |
| 42.8                | 24                      | 18.9                      | 20           | 40          | 4                        | 125000                    | 5.3                                | 6.25                                    | 25.0                | 0.0040                      | 1.10                |
| 52.2                | 24                      | 23.1                      | 20           | 40          | 4                        | 125000                    | 6.5                                | 6.25                                    | 27.6                | 0.0044                      | 1.07                |
| 61.7                | 24                      | 27.3                      | 20           | 40          | 4                        | 125000                    | 7.7                                | 6.25                                    | 29.9                | 0.0048                      | 1.02                |
| 71.1                | 24                      | 31.4                      | 20           | 40          | 4                        | 125000                    | 8.9                                | 6.25                                    | 31.9                | 0.0051                      | 1.03                |
| 24.6                | 24                      | 10.9                      | 20           | 40          | 6                        | 83500                     | 2.1                                | 4.17                                    | 15.5                | 0.0037                      | 1.03                |
| 33.6                | 24                      | 14.8                      | 20           | 40          | 6                        | 83500                     | 2.8                                | 4.17                                    | 18.6                | 0.0045                      | 1.04                |
| 42.8                | 24                      | 18.9                      | 20           | 40          | 6                        | 83500                     | 3.6                                | 4.17                                    | 19.7                | 0.0047                      | 1.05                |
| 52.2                | 24                      | 23.1                      | 20           | 40          | 6                        | 83500                     | 4.4                                | 4.17                                    | 21.6                | 0.0052                      | 1.07                |
| 61.7                | 24                      | 27.3                      | 20           | 40          | 6                        | 83500                     | 5.2                                | 4.17                                    | 22.9                | 0.0055                      | 1.00                |
| 71.1                | 24                      | 31.4                      | 20           | 40          | 6                        | 83500                     | 5.9                                | 4.17                                    | 24.7                | 0.0059                      | 1.01                |

**Table S2.** Laser microwelding of 1.1 mm thick Borofloat 33 glass plates by using sample translation velocities ( $v$ ) of 2, 4 and 6 mm/s. Datasets for  $v = 2$  mm/s were used to plot the graphs shown in Figure 5. An area of the heat-affected zone (HAZ) was calculated by assuming that the cross-section of HAZ has an elliptical shape.

| P [W] | $v$ [mm/s] | Location of laser beam focus from the top surface of the upper glass [mm] | Width of HAZ [ $\mu\text{m}$ ] | Height of HAZ [ $\mu\text{m}$ ] | Area of HAZ [ $\mu\text{m}^2$ ] | Mean periodicity of weld seams [ $\mu\text{m}$ ] |
|-------|------------|---------------------------------------------------------------------------|--------------------------------|---------------------------------|---------------------------------|--------------------------------------------------|
| 1.00  | 2          | 1.15                                                                      | 28                             | 88                              | 1930                            | < 30                                             |
| 1.00  | 2          | 1.20                                                                      | 32                             | 80                              | 2010                            | < 30                                             |
| 1.00  | 2          | 1.25                                                                      | 28                             | 88                              | 1930                            | < 30                                             |
| 1.25  | 2          | 1.15                                                                      | 44                             | 112                             | 3870                            | < 50                                             |
| 1.25  | 2          | 1.20                                                                      | 48                             | 112                             | 4220                            | < 50                                             |
| 1.25  | 2          | 1.25                                                                      | 40                             | 116                             | 3640                            | < 50                                             |
| 1.50  | 2          | 1.15                                                                      | 88                             | 132                             | 9120                            | 80                                               |
| 1.50  | 2          | 1.20                                                                      | 88                             | 136                             | 9400                            | 90                                               |
| 1.50  | 2          | 1.25                                                                      | 84                             | 132                             | 8710                            | 80                                               |
| 1.75  | 2          | 1.15                                                                      | 100                            | 144                             | 11300                           | 100                                              |
| 1.75  | 2          | 1.20                                                                      | 104                            | 148                             | 12100                           | 110                                              |
| 1.75  | 2          | 1.25                                                                      | 100                            | 152                             | 11900                           | 100                                              |
| 2.00  | 2          | 1.15                                                                      | 128                            | 176                             | 17700                           | 140                                              |
| 2.00  | 2          | 1.20                                                                      | 132                            | 176                             | 18200                           | 140                                              |
| 2.00  | 2          | 1.25                                                                      | 132                            | 180                             | 18700                           | 150                                              |
| 2.25  | 2          | 1.15                                                                      | 152                            | 200                             | 23900                           | 150                                              |
| 2.25  | 2          | 1.20                                                                      | 152                            | 204                             | 24300                           | 170                                              |
| 2.25  | 2          | 1.25                                                                      | 148                            | 200                             | 23200                           | 170                                              |
| 2.50  | 2          | 1.15                                                                      | 156                            | 208                             | 25500                           | 250                                              |
| 2.50  | 2          | 1.20                                                                      | 160                            | 212                             | 26600                           | 220                                              |
| 2.50  | 2          | 1.25                                                                      | 156                            | 216                             | 26500                           | 240                                              |
| 2.75  | 2          | 1.15                                                                      | 172                            | 224                             | 30300                           | > 750                                            |
| 2.75  | 2          | 1.20                                                                      | 168                            | 232                             | 30600                           | > 750                                            |
| 2.75  | 2          | 1.25                                                                      | 168                            | 232                             | 30600                           | > 750                                            |
| 2.50  | 4          | 1.15                                                                      | 168                            | 220                             | 29000                           | 240                                              |
| 2.50  | 4          | 1.20                                                                      | 156                            | 220                             | 26900                           | 310                                              |
| 2.50  | 4          | 1.25                                                                      | 144                            | 216                             | 24400                           | 280                                              |
| 2.75  | 4          | 1.15                                                                      | 156                            | 236                             | 28900                           | > 750                                            |
| 2.75  | 4          | 1.20                                                                      | 152                            | 232                             | 27700                           | > 750                                            |
| 2.75  | 4          | 1.25                                                                      | 156                            | 232                             | 28400                           | > 750                                            |
| 3.00  | 4          | 1.15                                                                      | 168                            | 228                             | 30100                           | > 750                                            |
| 3.00  | 4          | 1.20                                                                      | 168                            | 248                             | 32700                           | > 750                                            |
| 3.00  | 4          | 1.25                                                                      | 168                            | 244                             | 32200                           | > 750                                            |
| 3.25  | 4          | 1.15                                                                      | 180                            | 260                             | 36800                           | > 750                                            |
| 3.25  | 4          | 1.20                                                                      | 172                            | 276                             | 37300                           | > 750                                            |
| 3.25  | 4          | 1.25                                                                      | 172                            | 272                             | 36700                           | > 750                                            |
| 2.50  | 6          | 1.15                                                                      | 136                            | 216                             | 23100                           | 310                                              |
| 2.50  | 6          | 1.20                                                                      | 140                            | 224                             | 24600                           | 380                                              |
| 2.50  | 6          | 1.25                                                                      | 132                            | 224                             | 23200                           | 340                                              |
| 2.75  | 6          | 1.15                                                                      | 140                            | 240                             | 26400                           | > 750                                            |
| 2.75  | 6          | 1.20                                                                      | 140                            | 240                             | 26400                           | > 750                                            |

|      |   |      |     |     |       |       |
|------|---|------|-----|-----|-------|-------|
| 2.75 | 6 | 1.25 | 156 | 228 | 27900 | > 750 |
| 3.00 | 6 | 1.15 | 148 | 236 | 27400 | > 750 |
| 3.00 | 6 | 1.20 | 152 | 232 | 27700 | > 750 |
| 3.00 | 6 | 1.25 | 160 | 232 | 29100 | > 750 |
| 3.25 | 6 | 1.15 | 172 | 256 | 34600 | > 750 |
| 3.25 | 6 | 1.20 | 172 | 248 | 33500 | > 750 |
| 3.25 | 6 | 1.25 | 172 | 248 | 33500 | > 750 |

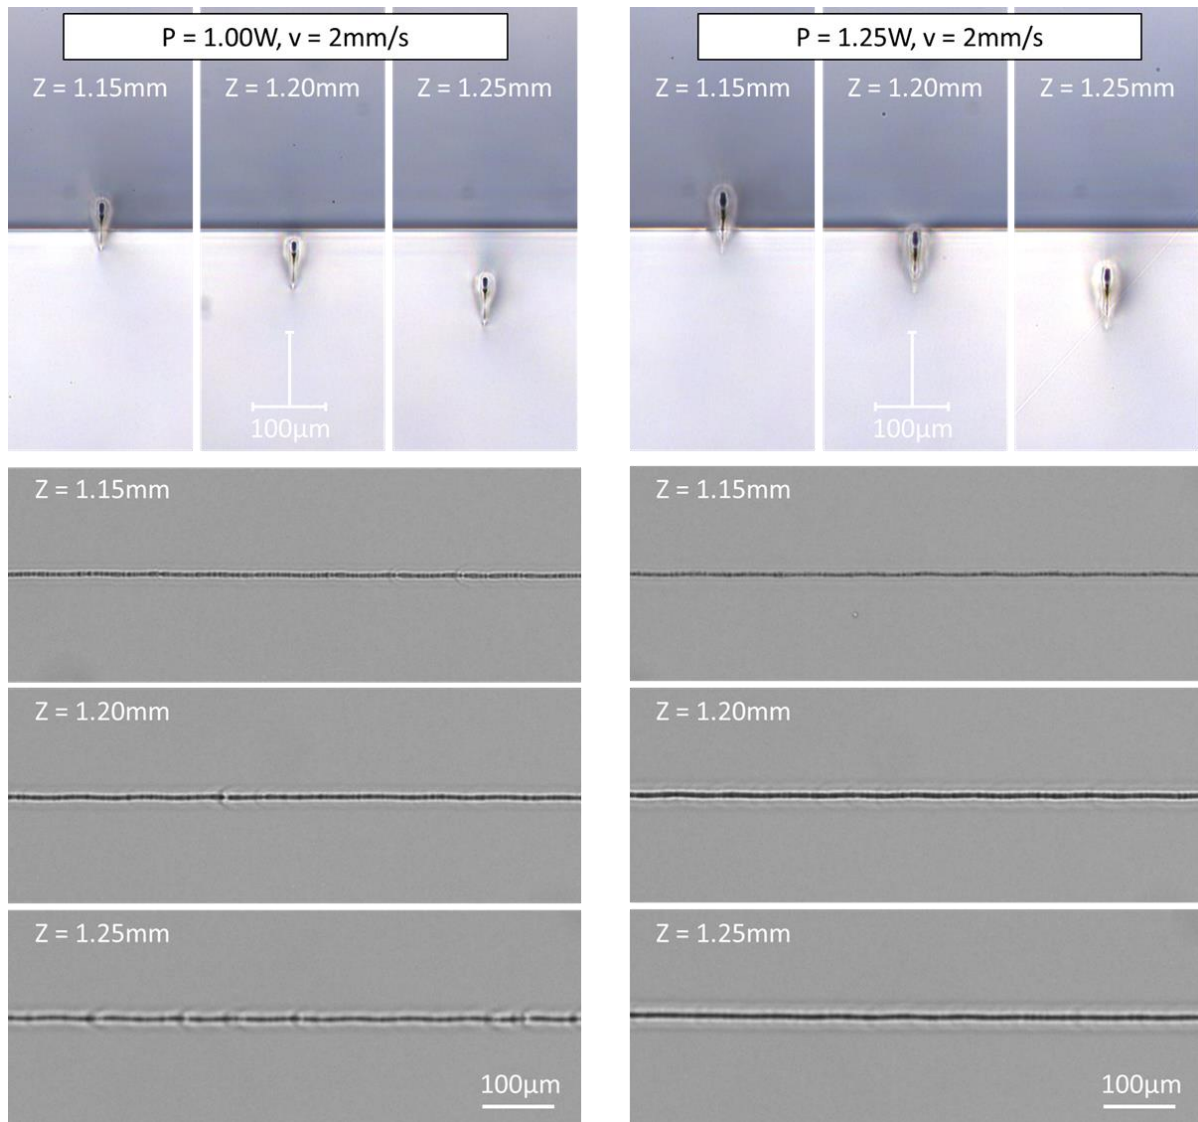

**Figure S1.** Cross-section and top view of the weld seams generated at the glass-glass interface by using laser powers ( $P$ ) of 1.00 and 1.25W and a sample translation velocity ( $v$ ) of 2 mm/s. The laser beam was focused at a distance  $Z$  (as indicated on images) below the top surface of the upper (1.1 mm thick) glass.

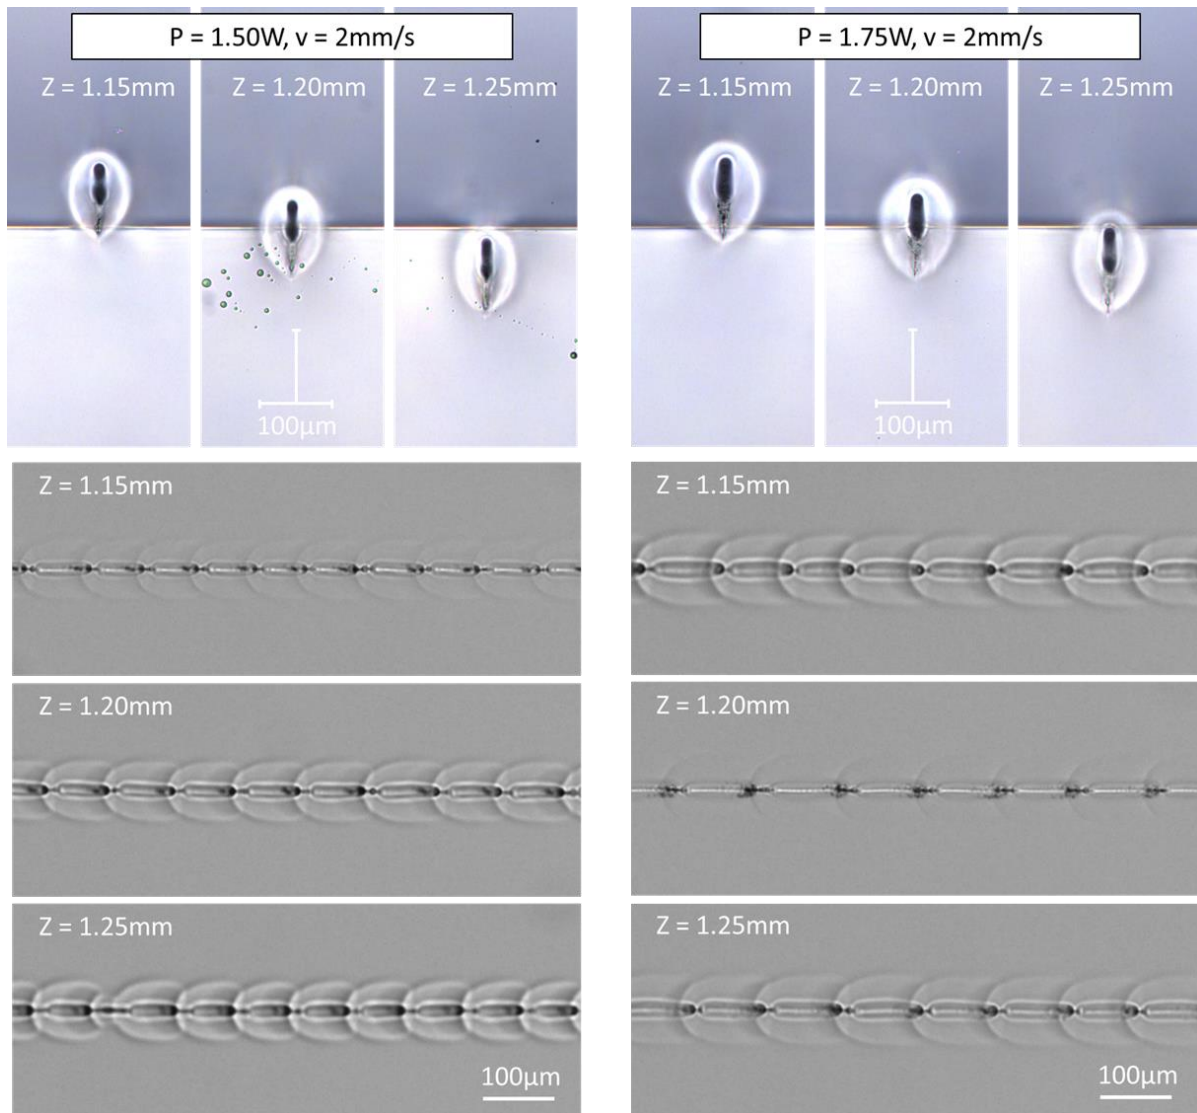

**Figure S2.** Cross-section and top view of the weld seams generated at the glass-glass interface by using laser powers (P) of 1.50 and 1.75W and a sample translation velocity (v) of 2 mm/s. The laser beam was focused at a distance Z (as indicated on images) below the top surface of the upper (1.1 mm thick) glass.

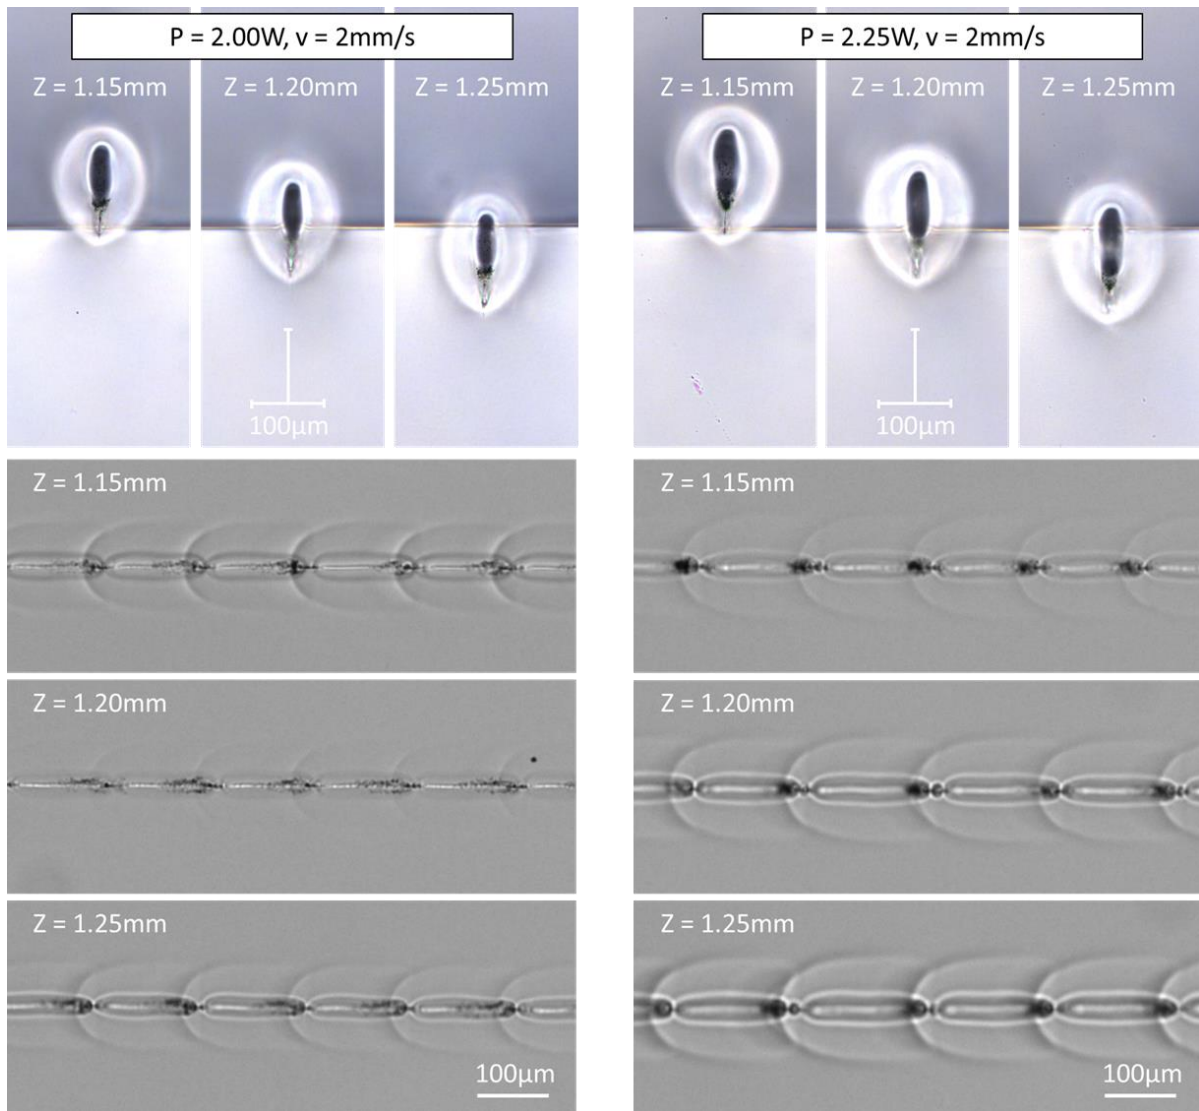

**Figure S3.** Cross-section and top view of the weld seams generated at the glass-glass interface by using laser powers ( $P$ ) of 2.00 and 2.25W and a sample translation velocity ( $v$ ) of 2 mm/s. The laser beam was focused at a distance  $Z$  (as indicated on images) below the top surface of the upper (1.1 mm thick) glass.



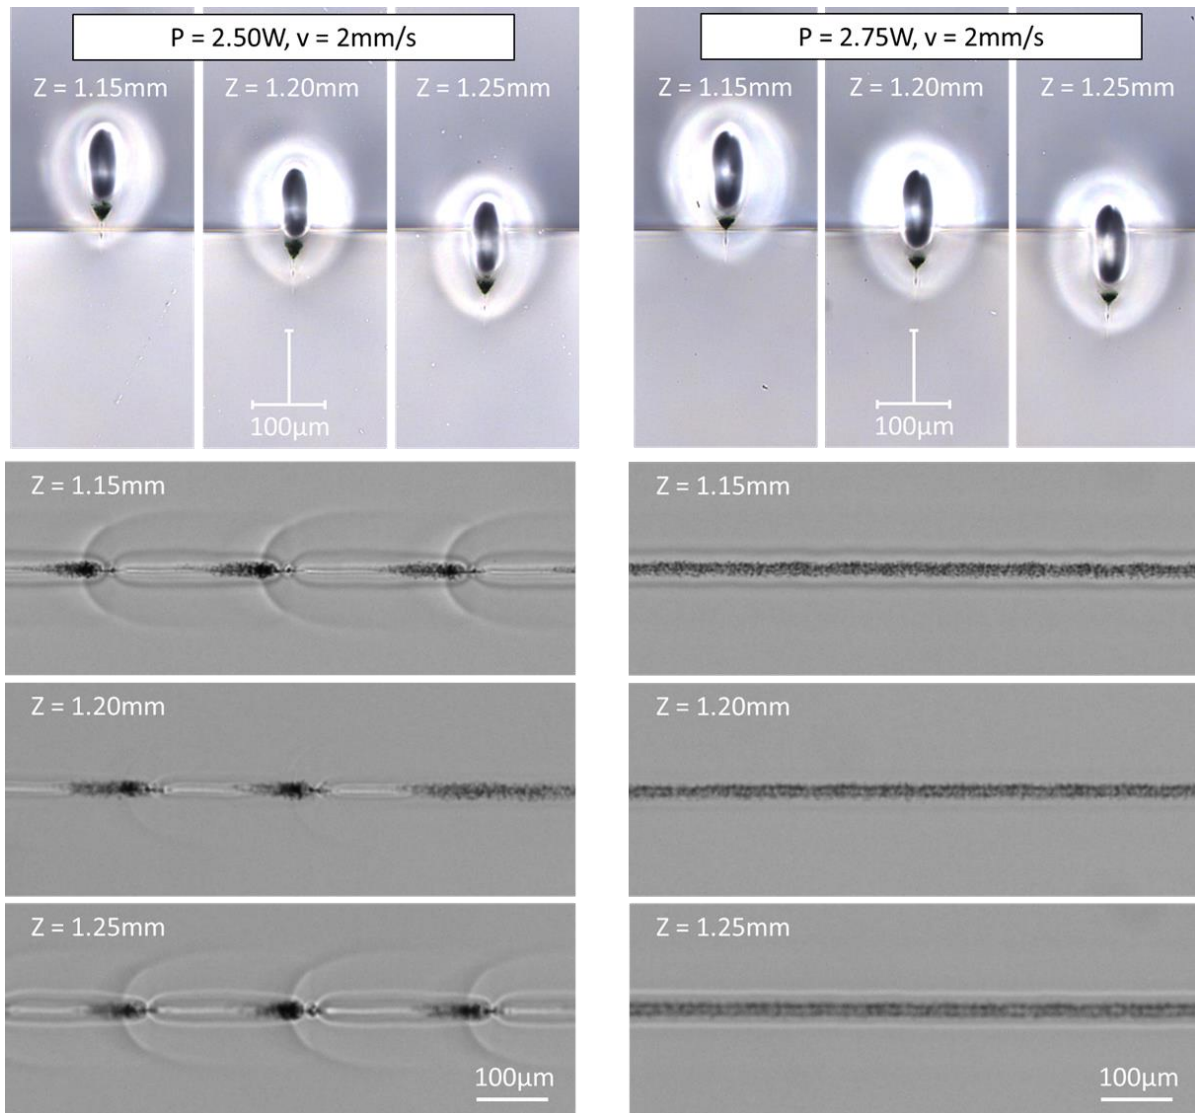

**Figure S4.** Cross-section and top view of the weld seams generated at the glass-glass interface by using laser powers ( $P$ ) of 2.50 and 2.75W and a sample translation velocity ( $v$ ) of 2 mm/s. The laser beam was focused at a distance  $Z$  (as indicated on images) below the top surface of the upper (1.1 mm thick) glass.

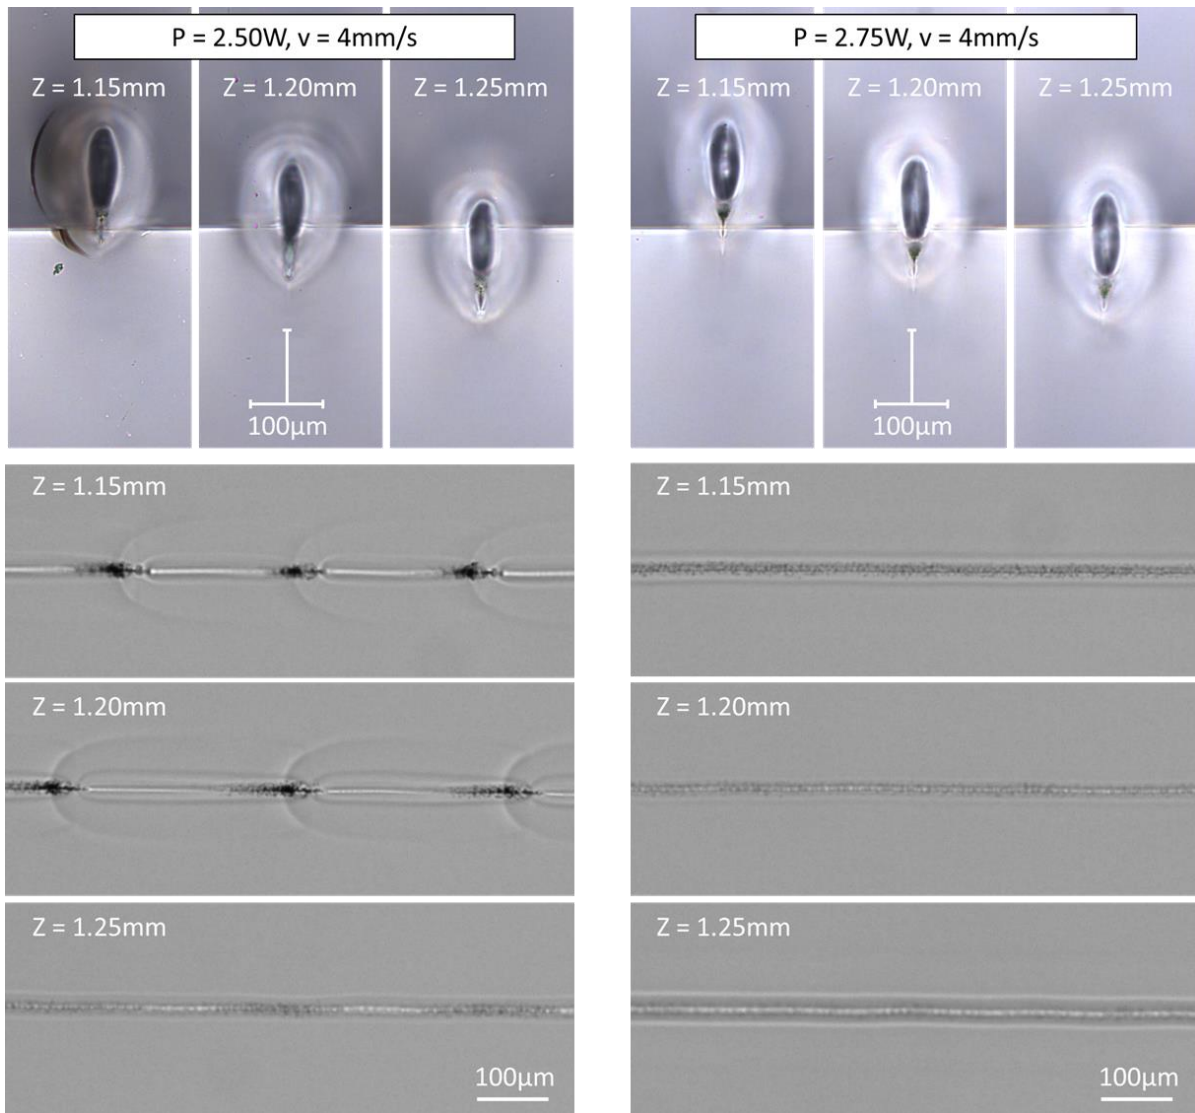

**Figure S5.** Cross-section and top view of the weld seams generated at the glass-glass interface by using laser powers ( $P$ ) of 2.50 and 2.75W and a sample translation velocity ( $v$ ) of 4 mm/s. The laser beam was focused at a distance  $Z$  (as indicated on images) below the top surface of the upper (1.1 mm thick) glass.

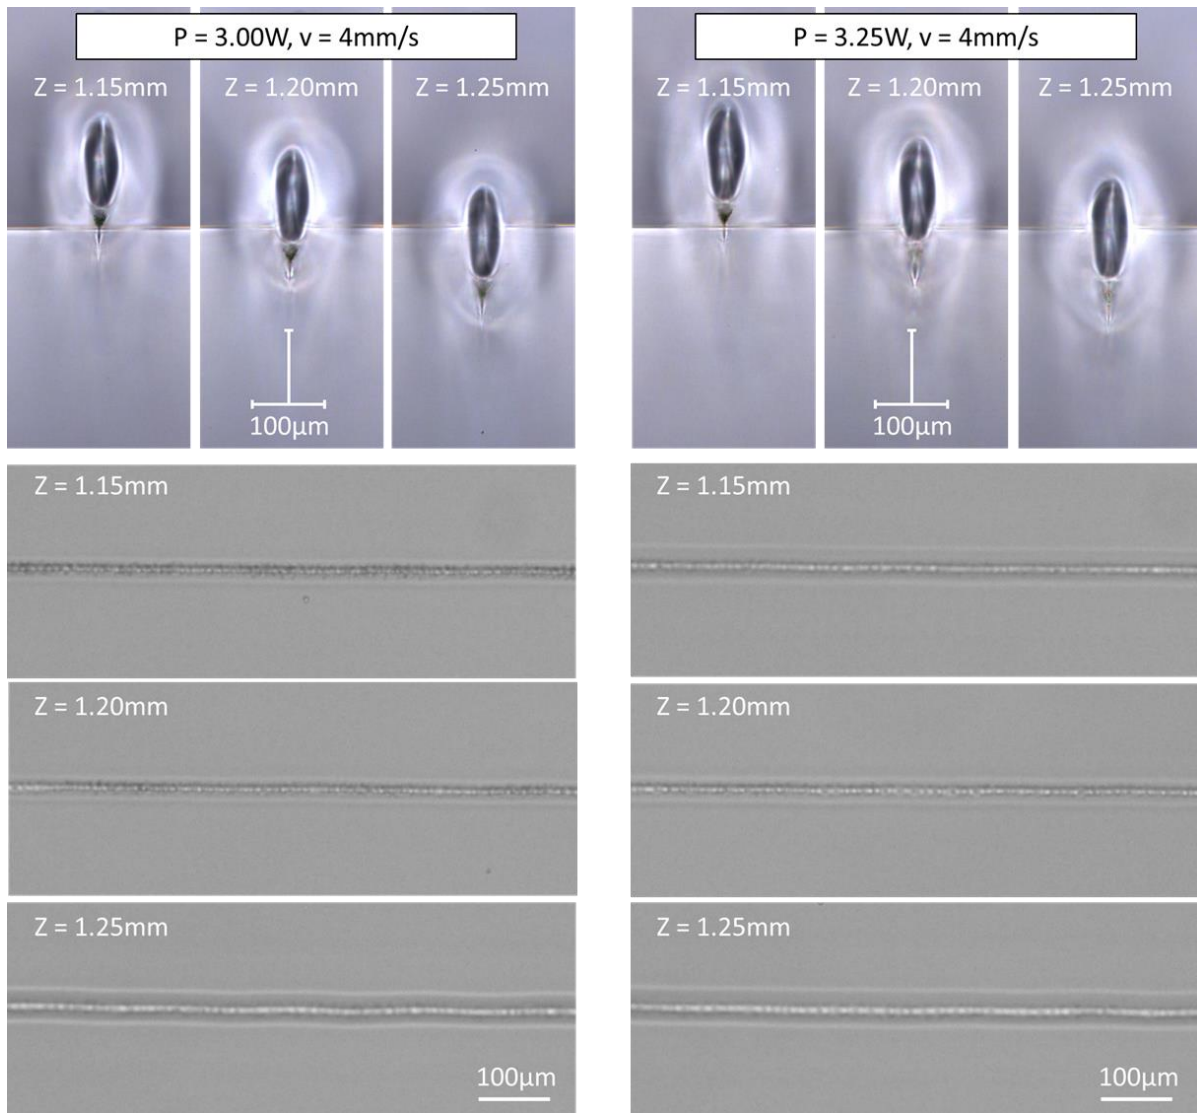

**Figure S6.** Cross-section and top view of the weld seams generated at the glass-glass interface by using laser powers ( $P$ ) of 3.00 and 3.25W and a sample translation velocity ( $v$ ) of 4 mm/s. The laser beam was focused at a distance  $Z$  (as indicated on images) below the top surface of the upper (1.1 mm thick) glass.

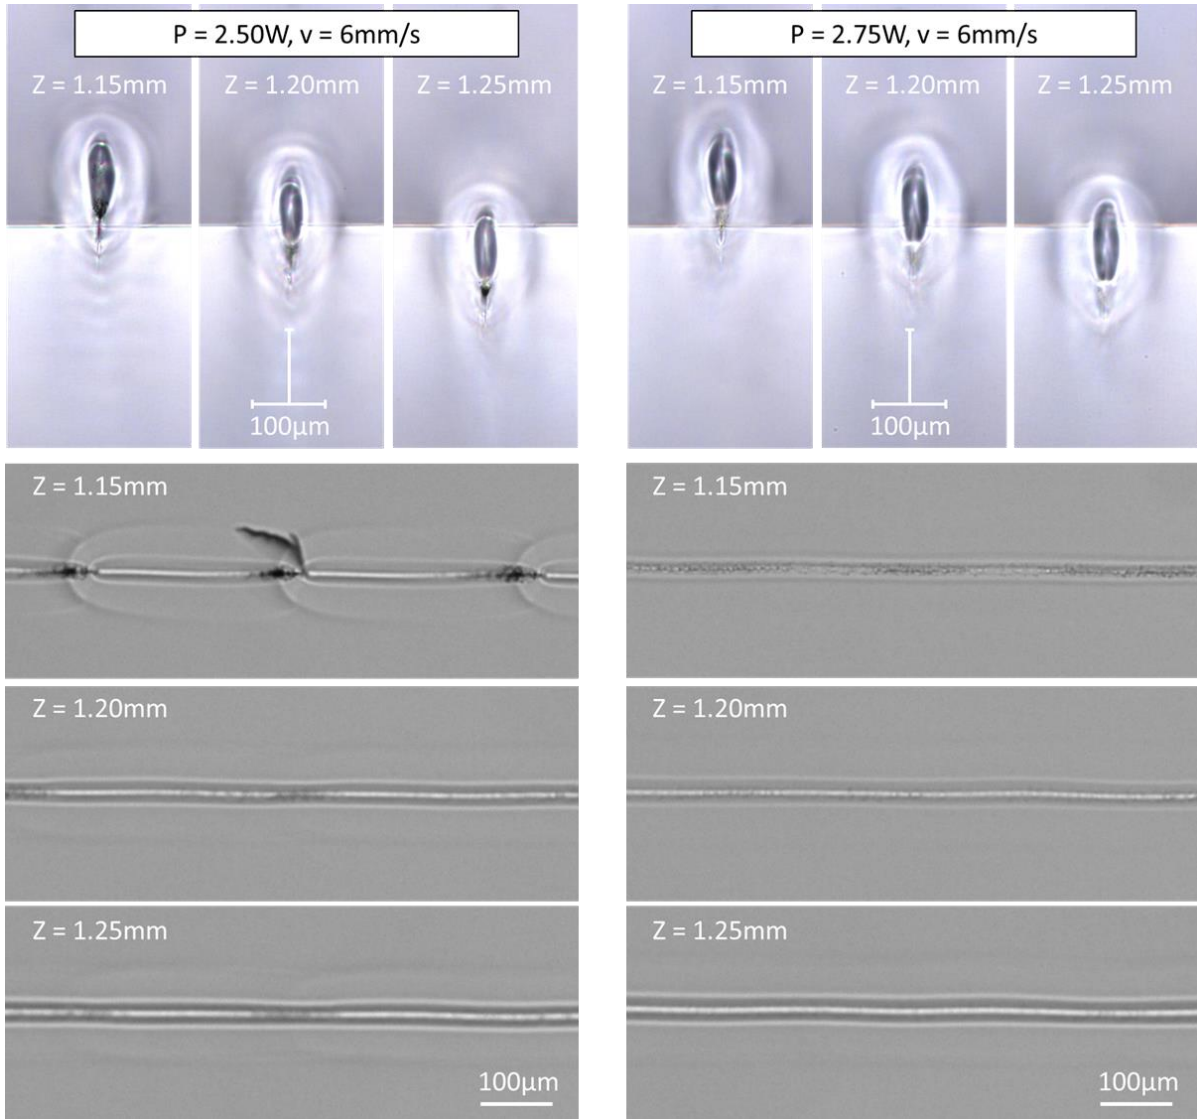

**Figure S7.** Cross-section and top view of the weld seams generated at the glass-glass interface by using laser powers ( $P$ ) of 2.50 and 2.75W and a sample translation velocity ( $v$ ) of 6 mm/s. The laser beam was focused at a distance  $Z$  (as indicated on images) below the top surface of the upper (1.1 mm thick) glass.

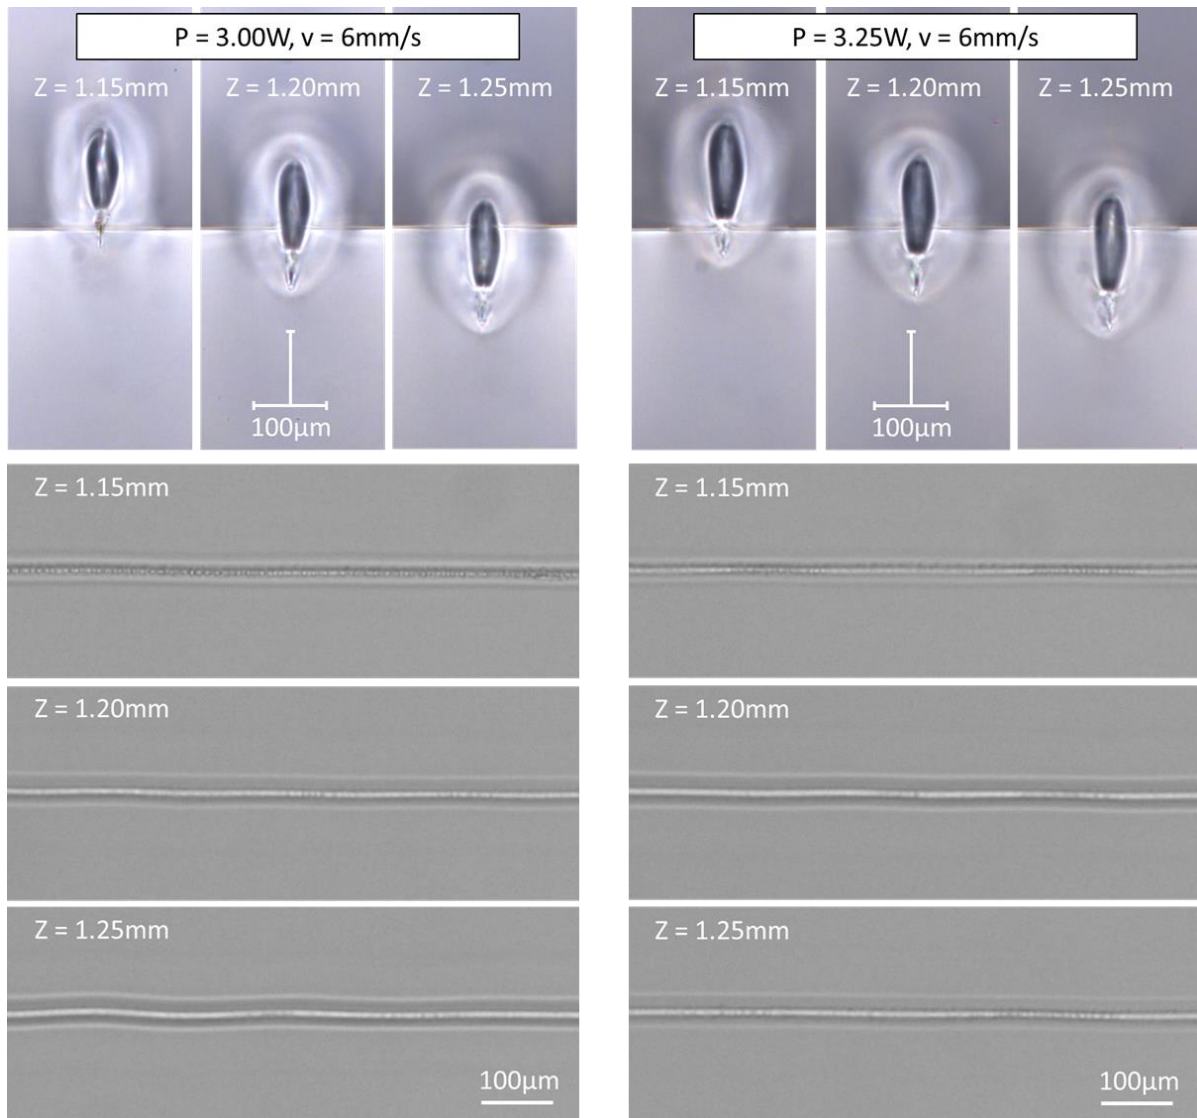

**Figure S8.** Cross-section and top view of the weld seams generated at the glass-glass interface by using laser powers (P) of 3.00 and 3.25W and a sample translation velocity (v) of 6 mm/s. The laser beam was focused at a distance Z (as indicated on images) below the top surface of the upper (1.1 mm thick) glass.



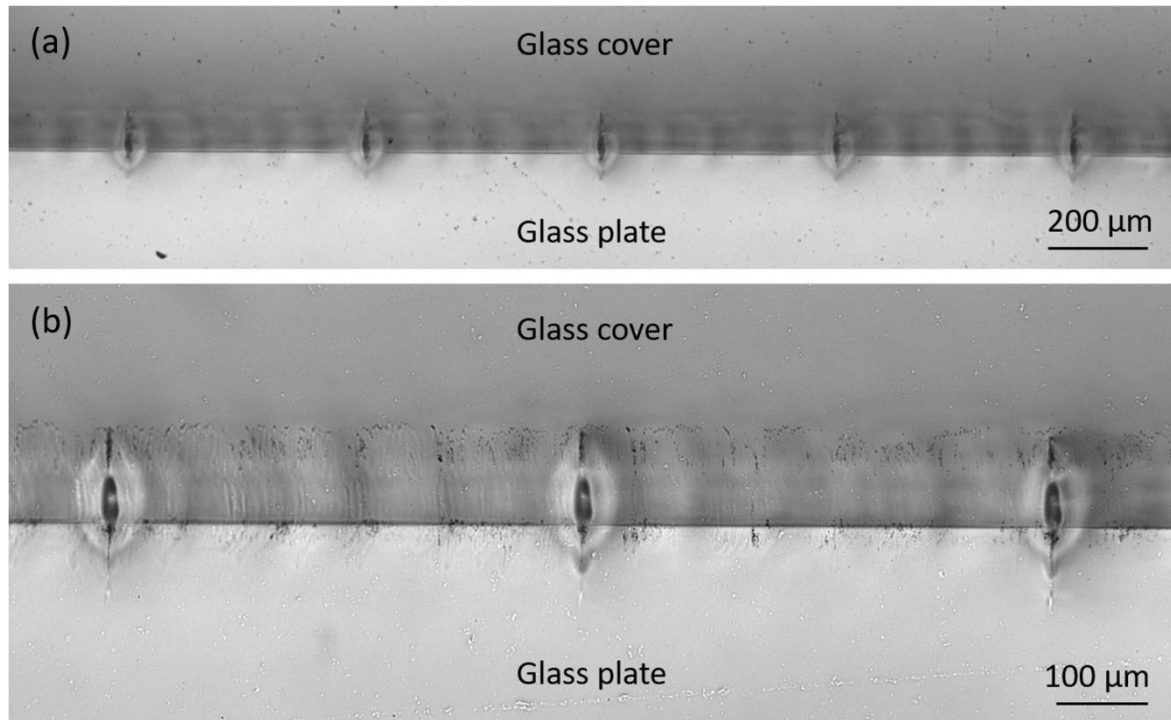

**Figure S9.** Cross-section of the weld seams generated at the interface of two glass plates. The laser power ( $P$ ) used for welding was 2.5 W, whereas the sample translation velocity ( $v$ ) was 2 mm/s. The laser beam was focused approximately 0.1 mm below the glass-glass interface. The distance between the welds is 0.5 mm. The images were taken using a Leica optical microscope with an objective zoom: (a)  $\times 5$  and (b)  $\times 10$ . Please note that these images also show a welding line which was generated along the glass-glass interface using the same process parameters. For these laser welding parameters, the periodicity of the welds is observed.

**Table S3.** Laser machining of Borofloat 33 glass by using a defocused laser beam (see the  $2\omega$  values) at  $\lambda = 515$  nm. These datasets were used to plot the graphs in Figure 7.

| 1 <sup>st</sup> laser pass (horizontal) |                             |                              | 2 <sup>nd</sup> laser pass (vertical) |                             |                              | Absolute depth [ $\mu\text{m}$ ] | Depth in 2 <sup>nd</sup> pass [ $\mu\text{m}$ ] | $S_a$ [ $\mu\text{m}$ ] |
|-----------------------------------------|-----------------------------|------------------------------|---------------------------------------|-----------------------------|------------------------------|----------------------------------|-------------------------------------------------|-------------------------|
| Z value [mm]                            | $2\omega$ [ $\mu\text{m}$ ] | F [ $\text{J}/\text{cm}^2$ ] | Z value [mm]                          | $2\omega$ [ $\mu\text{m}$ ] | F [ $\text{J}/\text{cm}^2$ ] |                                  |                                                 |                         |
| 0                                       | 24.0                        | 25.0                         | -                                     | -                           | -                            | 22.0                             | 0                                               | 1.23                    |
| 0                                       | 24.0                        | 25.0                         | 0                                     | 24.0                        | 25.0                         | 45.0                             | 23.0                                            | 1.35                    |
| 0                                       | 24.0                        | 25.0                         | 0.25                                  | 25.6                        | 22.0                         | 49.0                             | 27.0                                            | 1.29                    |
| 0                                       | 24.0                        | 25.0                         | 0.50                                  | 29.8                        | 16.2                         | 54.0                             | 32.0                                            | 0.99                    |
| 0                                       | 24.0                        | 25.0                         | 0.75                                  | 35.8                        | 11.2                         | 55.0                             | 33.0                                            | 0.94                    |
| 0                                       | 24.0                        | 25.0                         | 1.00                                  | 42.8                        | 7.9                          | 52.0                             | 30.0                                            | 0.86                    |
| 0                                       | 24.0                        | 25.0                         | 1.25                                  | 50.4                        | 5.7                          | 44.0                             | 22.0                                            | 0.79                    |
| 0                                       | 24.0                        | 25.0                         | 1.50                                  | 58.4                        | 4.2                          | 36.0                             | 14.0                                            | 0.81                    |
| 0                                       | 24.0                        | 25.0                         | 1.75                                  | 66.6                        | 3.2                          | 23.3                             | 1.3                                             | 1.08                    |
| 0                                       | 24.0                        | 25.0                         | 2.00                                  | 75.0                        | 2.6                          | 23.1                             | 1.1                                             | 1.19                    |
| 0                                       | 24.0                        | 25.0                         | 2.25                                  | 83.4                        | 2.1                          | 23.0                             | 1.0                                             | 1.31                    |
| 0                                       | 24.0                        | 25.0                         | 2.50                                  | 92.0                        | 1.7                          | 22.8                             | 0.8                                             | 1.34                    |

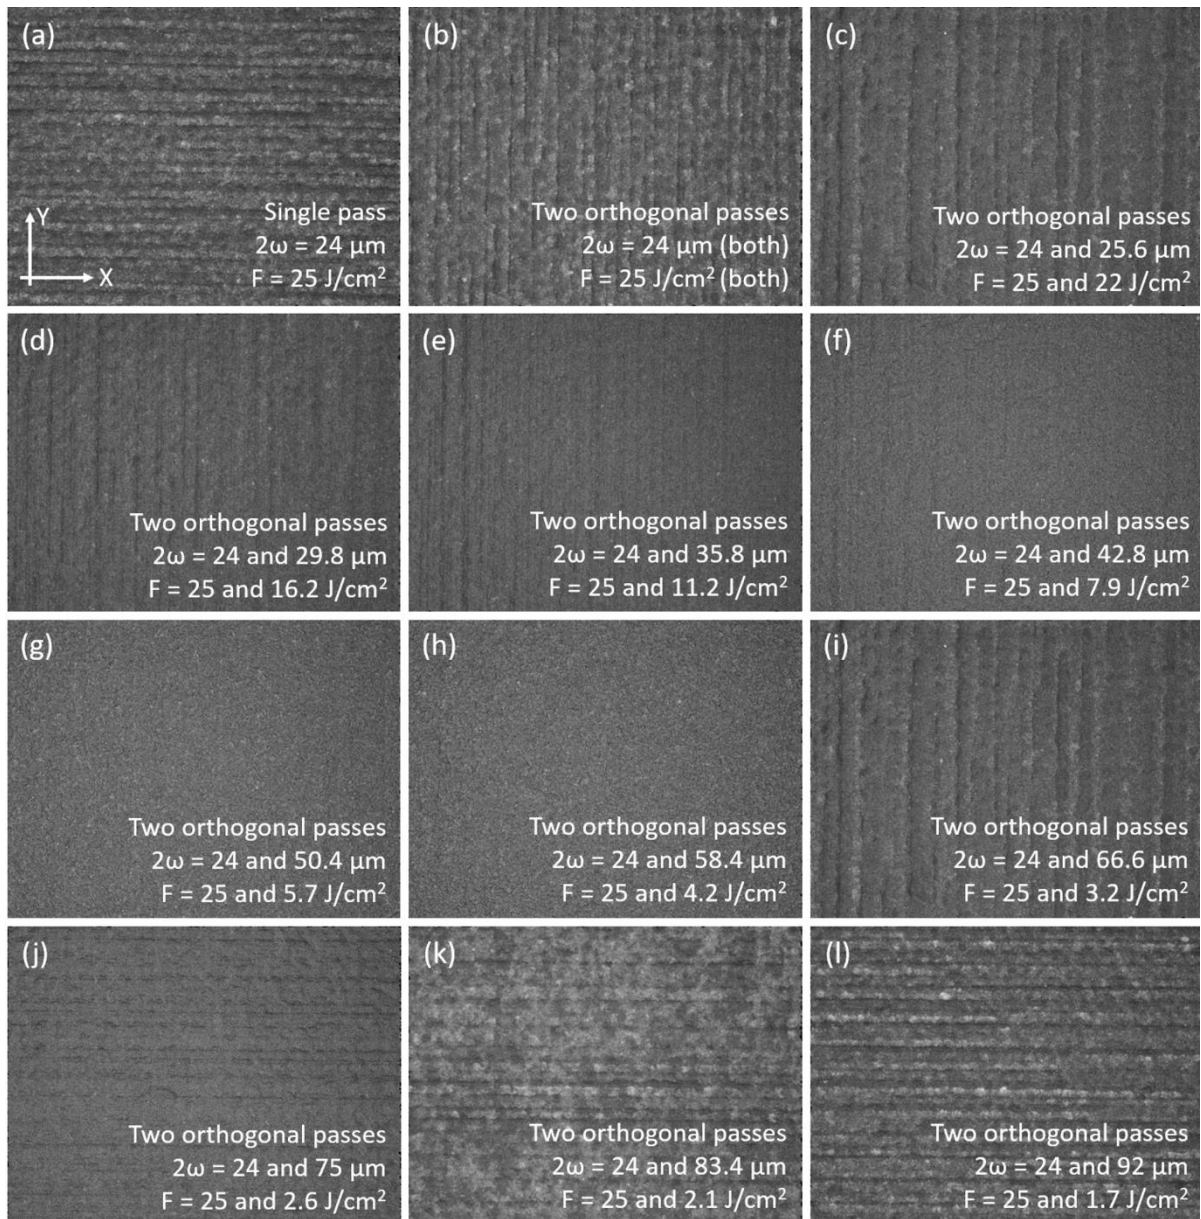

**Figure S10.** Glass surfaces after laser micromachining using: (a) a single laser pass, laser spot diameter ( $2\omega$ ) of  $24\ \mu\text{m}$ , and peak fluence ( $F$ ) of  $25\ \text{J}/\text{cm}^2$ ; (b) two laser passes orthogonal to each other using the same laser spot sizes and peak fluence values ( $2\omega = 24\ \mu\text{m}$  and  $F = 25\ \text{J}/\text{cm}^2$ ); (c)-(l) two laser passes orthogonal to each other using two different laser spot sizes and peak fluence values (first pass:  $2\omega = 24\ \mu\text{m}$  and  $F = 25\ \text{J}/\text{cm}^2$ , second pass: the  $2\omega$  and  $F$  values as listed in each image). The other laser process parameters were as follows: PRF = 40 kHz,  $v = 80\ \text{mm}/\text{s}$ ,  $\Delta H = 6\ \text{mm}$  (bidirectional sequential scanning). The first laser pass was always along the X axis, whereas the second pass was along the Y axis. The axes are indicated in Figure S9 (a).
